# Supplementary material
Source: MDPI journal article supplement (https://www.mdpi.com/2313-0105/8/12/286)
Supplement: s1 [file s1]

## Supporting data

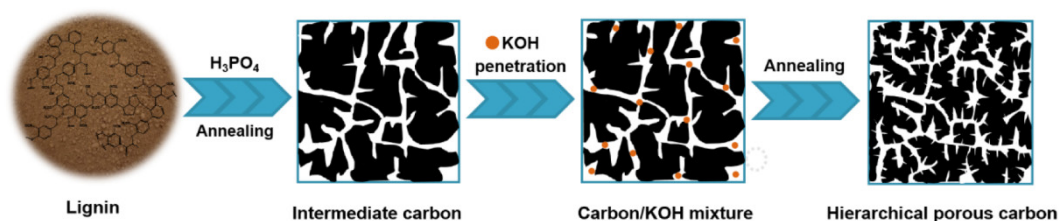

**Figure S1.** Schematic representation of the synthetic strategy of lignin-derived OHPC.

Figure S1 illustrated the detailed synthetic strategy of lignin-derived OHPCs. Firstly, lignin as carbon source was thoroughly immersed into H<sub>3</sub>PO<sub>4</sub> aqueous solution. After dried, the mixture was annealed at 400 °C for 1 h to obtain IC. Subsequently, the IC was homogeneously mixed with KOH solution, followed by heat treatment under a N<sub>2</sub> atmosphere to form lignin-derived OHPCs. Actually, the initial H<sub>3</sub>PO<sub>4</sub> pre-treatment played positive advantage in subsequent KOH activation process and effectively led to the formation of OHPCs. Concretely, the H<sub>3</sub>PO<sub>4</sub> assistants cross-linked with lignin sources and generated phosphate (and/or polyphosphate) esters groups throughout the lignin structure, which endowed the pre-activated IC with hierarchical porous structure. In addition, the IC also inherited rich oxygen-containing groups as shown in Figure S4. During subsequent KOH activation, such multi-scale porous structure and abundant oxygen species of IC collectively improved the wettability between IC and KOH solution and facilitated the evolution of pore morphologies, eventually forming the lignin-derived OHPCs. The formation of phosphate groups and the role of pre-treatment in subsequent KOH activation was systemically discussed in supplemental materials.

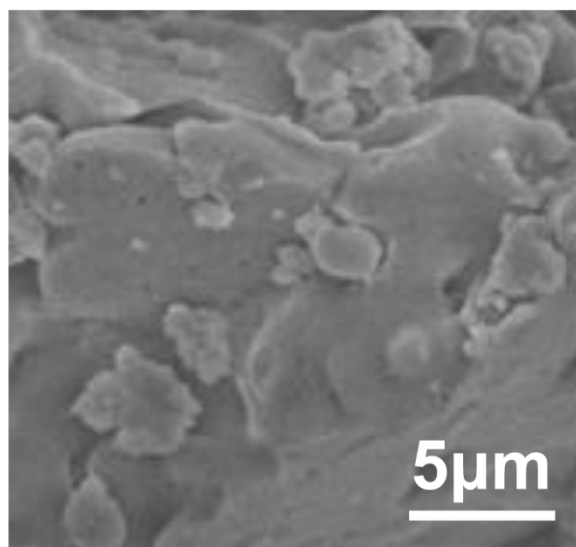

**Figure S2.** SEM image of the raw lignin particles.

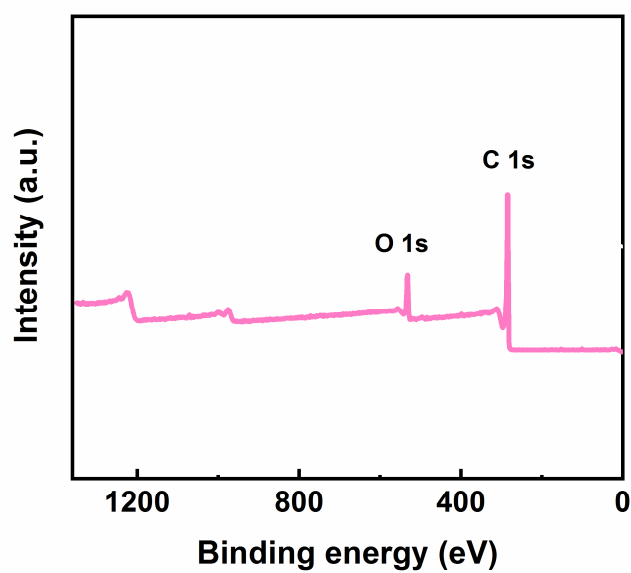

**Figure S3.** XPS survey spectrum of OHPC.

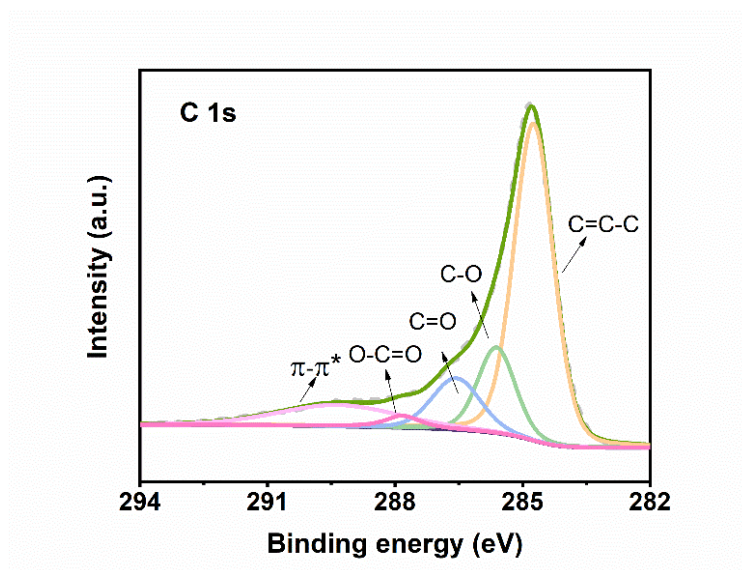

**Figure S4.** High-resolution C1s XPS spectrum of OHPC material.

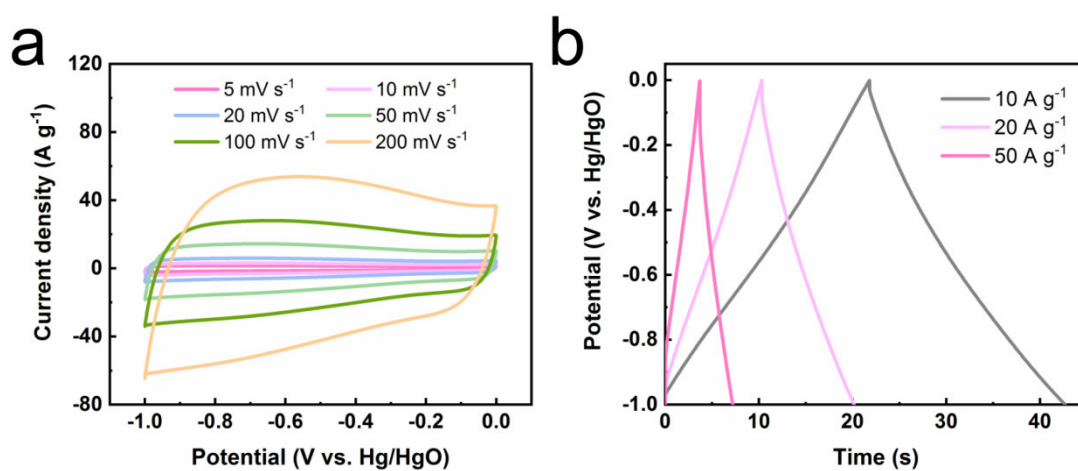

**Figure S5.** (a) The rate-dependent CV curves of OHPC at scan rates varied from 5 to 200 mV s<sup>-1</sup>. (b) The GCD profiles of OHPC at different rate from 10 A g<sup>-1</sup> to 50 A g<sup>-1</sup>.

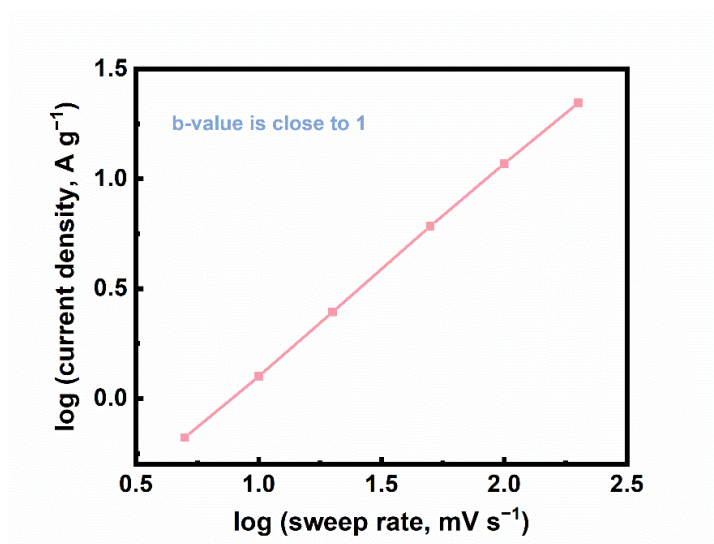

**Figure S6.** b-value determination of the anodic peak current density shows that this value is approximately 1.

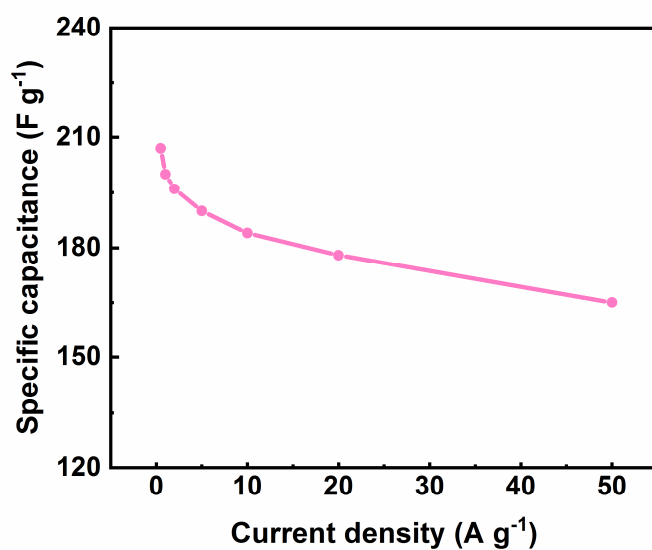

**Figure S7.** The capacitance performance of the porous carbon electrode by direct KOH activation of lignin at 700 °C.

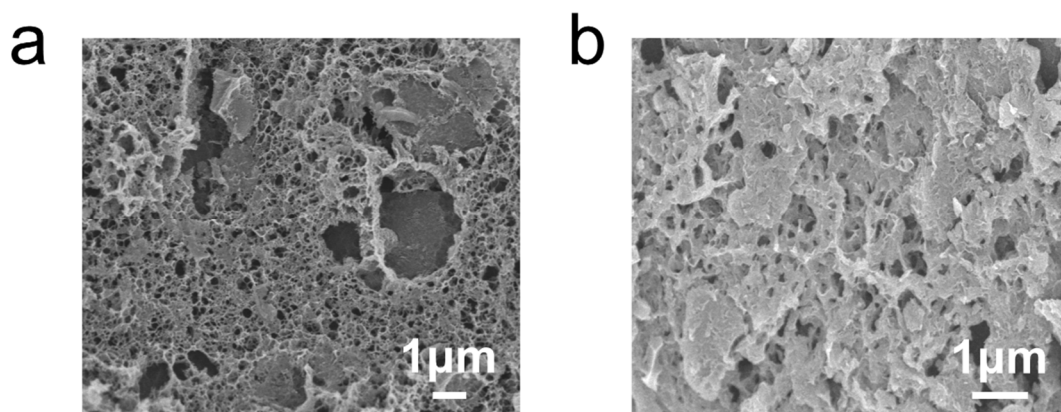

**Figure S8.** The SEM images of lignin-derived hierarchical porous carbon calcinated at different temperatures (a) 800 °C and (b) 900 °C.

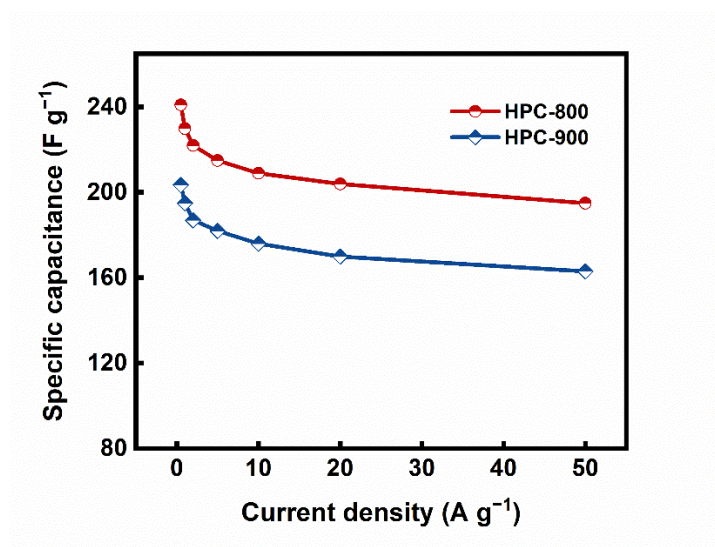

**Figure S9.** The gravimetric rate performance of lignin-derived hierarchical porous carbon calcinated at 800 °C and 900 °C from 0.5 to 50  $\text{A g}^{-1}$ .

**Table S1.** The element concentration of OHPC sample.

| Elements | Concentration (%) |
|----------|-------------------|
| C        | 89.22             |
| O        | 10.78             |

**Table S2.** Comparison of electrochemical performances for the lignin-based carbon materials.

| Electrode             | precursor                           | Specific surface area (m <sup>2</sup> g <sup>-1</sup> ) | Mass loading            | Voltage window (V) | Electrolyte                         | Specific capacitance (F g <sup>-1</sup> ) | Rate capability               | E (W h kg <sup>-1</sup> ) (P (KW kg <sup>-1</sup> )) | References |
|-----------------------|-------------------------------------|---------------------------------------------------------|-------------------------|--------------------|-------------------------------------|-------------------------------------------|-------------------------------|------------------------------------------------------|------------|
| PGBC <sup>a</sup>     | Bamboo char                         | 1732                                                    | 4.8 mg                  | 3.0                | KOH/PVA                             | 222.0 at 0.5 A g <sup>-1</sup>            | 51.8% at 20 A g <sup>-1</sup> | 6.68 (0.1)                                           | [60]       |
| HOMC <sup>b</sup>     | Walnut shell lignin                 | 2033                                                    | 2.4 mg                  | 0–1.0              | 6 M KOH                             | 286 at 0.2 A g <sup>-1</sup>              | 72.1% at 20 A g <sup>-1</sup> | 13.5 (44.3)                                          | [58]       |
| Porous carbons        | Lignin                              | 3065                                                    | 3 mg                    | 0–1.0              | 6 M KOH                             | 325 at 0.5 A g <sup>-1</sup>              | 80.8% at 50 A g <sup>-1</sup> | 8.1 (0.1)                                            | [37]       |
| Porous carbon         | Oxidized lignin                     | 3094                                                    | -                       | 0–1.0              | 6 M KOH                             | 352.9 at 0.5 A g <sup>-1</sup>            | 82.7% at 10 A g <sup>-1</sup> | 9.5 (0.025)                                          | [52]       |
| PCS <sup>c</sup>      | Sodium lignosulphonate              | 1372.87                                                 | 5 mg                    | 0–1.0              | 3 M KOH                             | 340 at 0.5 A g <sup>-1</sup>              | 72% at 10 A g <sup>-1</sup>   | 9.7 (0.25)                                           | [62]       |
| CAs <sup>d</sup>      | lignin                              | 1681.6                                                  | -                       | 0–1.0              | 1 M H <sub>2</sub> SO <sub>4</sub>  | 260.3 at 1.0 A g <sup>-1</sup>            | 60.7% at 20 A g <sup>-1</sup> | 26.25 (1.0)                                          | [63]       |
| N, S-HPC <sup>e</sup> | Sodium lignosulfonate               | 1454.7                                                  | -                       | 0–1.0              | 6 M KOH                             | 269 at 0.5 A g <sup>-1</sup>              | 62% at 50 A g <sup>-1</sup>   | 37.4 (0.062)                                         | [54]       |
| lignin/PAN nanofiber  | Alkali lignin                       | 1176.0                                                  | -                       | 0–1.0              | lignin hydrogel in 3.3 M KOH        | -                                         | -                             | 4.49 (0.252)                                         | [61]       |
| Porous carbon         | Alkali lignin                       | 1831                                                    | 2.5 mg cm <sup>-2</sup> | 0-1.0              | 6 M KOH                             | □428 at 1.0 A g <sup>-1</sup>             | 82.9% at 30 A g <sup>-1</sup> | 66.18 (0.312) in EMIM TFSI                           | [36]       |
| LCNFs <sup>f</sup>    | Melon seed shells and peanut shells | 1254.5                                                  | -                       | -1.6-0             | 1 M Na <sub>2</sub> SO <sub>4</sub> | 533.7 at 0.25 A g <sup>-1</sup>           | 90.6% at 10 A g <sup>-1</sup> | 69.7 (0.78)                                          | [56]       |

|                        |                          |        |                             |       |                                    |                                                |                             |                                                   |           |
|------------------------|--------------------------|--------|-----------------------------|-------|------------------------------------|------------------------------------------------|-----------------------------|---------------------------------------------------|-----------|
| CNFs <sup>g</sup>      | Softwood Kraft lignin    | 1124   | 2.212 mg cm <sup>-2</sup>   | 0-0.8 | 6 M KOH                            | 103.6 at 0.25 A g <sup>-1</sup>                | 58.2 at 4 A g <sup>-1</sup> | -                                                 | [57]      |
| Carbon aerogels        | Softwood kraft lignin    | 1,609  | -                           | 0-1.0 | 1.0 H <sub>2</sub> SO <sub>4</sub> | 122 at 1.0 A g <sup>-1</sup>                   | 46.4% at 1A g <sup>-1</sup> | 3.2 (0.209)                                       | [53]      |
| Carbon nanofibers      | Lignin/PVA blend (80:20) | 2170   | -                           | 3.5   | Pyr <sub>14</sub> TFSI             | 87 at 1.0 A g <sup>-1</sup>                    | -                           | 38 (1.67)                                         | [59]      |
| LCNFs-PRL <sup>h</sup> | Poplar                   | 1062.5 | -                           | 0-1.0 | 6 M KOH                            | 349.2 at 1.0 A g <sup>-1</sup>                 | 85.4% at 5A g <sup>-1</sup> | 56.9 (0.4) in 1 M Na <sub>2</sub> SO <sub>4</sub> | [55]      |
| OHCP                   | Industrial lignin        | 1289.7 | 1.5-2.0 mg cm <sup>-2</sup> | 0-1.0 | 6 M KOH                            | 258 F g <sup>-1</sup> at 0.5 A g <sup>-1</sup> | 80% at 50 A g <sup>-1</sup> | 9.27 (0.025)                                      | This work |

<sup>a</sup> Three-dimensional porous graphitic biomass carbon

<sup>b</sup> Ordered mesoporous carbons (OMCs) with hierarchical pore structure

<sup>c</sup> Porous carbon spheres

<sup>d</sup> Carbon aerogels (CAs) with hierarchically porous morphologies

<sup>e</sup> Three-dimensional interconnected nitrogen and sulfur codoped porous carbon materials

<sup>f</sup> Light-weight lignin-based carbon nanofibers

<sup>g</sup> Freestanding nonwoven carbon fiber

<sup>h</sup> Poplar lignin (PRL) based lignin-based carbon nanofibers
